# Supplementary material for: Methods to Compare Adverse Events in Twitter to FAERS, Drug Information Databases, and Systematic Reviews: Proof of Concept with Adalimumab
Source: PubMed Central journal article supplement — Drug Saf. 2018 Aug 30;41(12):1397–410. doi: 10.1007/s40264-018-0707-6 (PMC6223697; doi:10.1007/s40264-018-0707-6), 2018-08-30
Supplement: 40264_2018_707_MOESM1_ESM.pdf [file 40264_2018_707_MOESM1_ESM.pdf]

## Electronic Supplementary Material 1

**Article Title:** Methods to compare Adverse Events in Twitter to FAERS, Drug Information Databases, and Systematic Reviews: Proof of Concept with Adalimumab

**Journal:** Drug Safety

**Authors:**

Karen Smith<sup>1</sup>, Su Golder<sup>2</sup>, Abeed Sarkar<sup>3</sup>, Yoon Loke<sup>4</sup>, Karen O'Connor<sup>3</sup>, Graciela Gonzalez-Hernandez<sup>3</sup>

<sup>1</sup>Rueckert-Hartman College for Health Professions, Regis University, Denver, CO, USA.

<sup>2</sup>Department of Health Sciences, University of York, York, UK.

<sup>3</sup>Department of Biostatistics, Epidemiology and Informatics, Perelman School of Medicine, University of Pennsylvania, Philadelphia, PA, USA.

<sup>4</sup>Norwich Medical School, University of East Anglia, Norwich, UK.

**Corresponding author:**

Graciela Gonzalez-Hernandez

Email: [gragon@pennmedicine.upenn.edu](mailto:gragon@pennmedicine.upenn.edu)

Appendix 1

Appendix 1: Pooled Adverse Events mentioned in Micromedex, Lexicomp, and Clinical Pharmacology to Estimate Averages

| Adverse Event Category                                                                    | Micromedex                                                                                                                            | Lexicomp                                                                                                                      | Clinical Pharmacology                                                                                                               | Drug Database Composite Average |
|-------------------------------------------------------------------------------------------|---------------------------------------------------------------------------------------------------------------------------------------|-------------------------------------------------------------------------------------------------------------------------------|-------------------------------------------------------------------------------------------------------------------------------------|---------------------------------|
| Injection Site Reactions                                                                  | Injection site reaction: Adult 8-20%;<br>Injection site pain: Pediatric 6-19%<br>Injection site reaction: Pediatric 5-16%<br>Rash 12% | Injection site reaction: 12-20%, erythema, itching, hemorrhage, pain, swelling<br>Rash 6-12%                                  | Injection site reaction: Adult: 20%<br>Injection site pain: Pediatric 6-19%<br>Injection site reaction Pediatric: 5-16%<br>Rash 12% | 13.8%                           |
| Musculoskeletal: Fatigue; weakness, spasms, malaise (Creatinine kinase: surrogate marker) | Creatine kinase, Pediatric 15%<br>Weakness associated with Guillane Barre: 1 case report                                              | Muscle cramps <5%<br>Increased creatinine phosphokinase: 15%<br>Weakness <1%<br>Guillane Barre <1%<br>Myositis (Pediatric)<1% | Creatine phosphokinase Pediatric: 15%<br>Muscle cramps <5%<br>Myasthenia <5%<br>Myositis Pediatric<5%                               | 7%                              |
| Pain, all locations                                                                       | Chest Pain <5%<br>Abdominal pain 7%<br>composite                                                                                      | Chest Pain <5%<br>Torso pain <5%<br>Abdominal pain 7%<br>Pelvic Pain <5%<br>Back pain 6%<br>Limb pain <5%                     | Chest Pain <5%<br>Abdominal Pain 7%<br>Back pain 6%<br>Extremity, pelvic, thorax pain all <5%                                       | 5.5%                            |
| Abdominal                                                                                 | Nausea 9%<br>GI hemorrhage <5%<br>Vomiting: 1 case report                                                                             | Nausea 9%, cholecystitis 5%, cholelithiasis <5%, esophagitis <5%, gastrointestinal hemorrhage <5%, vomiting <5%               | cholecystitis 5%, cholelithiasis <5%, esophagitis <5%, vomiting <5%<br>GI Bleed/perforation <= 5%                                   | 7%                              |
| Neurologic symptoms: Anxiety/ Depression/ Isomnia/ Panic/ Mood disorders                  | Not reported                                                                                                                          | Confusion <5%                                                                                                                 | Confusion<5%                                                                                                                        | 2.5%                            |
| Dermatologic                                                                              | Rash 12%<br>Psoriasis: case reports, rate not listed                                                                                  | Rash: 6-12%<br>Plaque psoriasis: 3%<br>Psoriasis: (new onset, palmoplantar, pustular, exacerbation) <1%                       | Rash: 12%<br>Psoriasis: Rate not listed<br>Pruritis: rate not listed                                                                | 12%                             |
| Hypersensitivity                                                                          | Hypersensitivity: Pediatric, 5-6%<br>Adult: case report                                                                               | Hypersensitivity: Pediatric 6%;<br>Adult 1%                                                                                   | Hypersensitivity: Pediatric 6%<br>Anaphylaxis 1%<br>Nonspecific allergy in children <6%                                             | 1%                              |

|                                                                               |                                                                                                                                                                                                                                                                                                                                                                                                                                                                                                                     |                                                                                                                                                                                                                        |                                                                                                                                                                                                                                                                                                |                                                                            |
|-------------------------------------------------------------------------------|---------------------------------------------------------------------------------------------------------------------------------------------------------------------------------------------------------------------------------------------------------------------------------------------------------------------------------------------------------------------------------------------------------------------------------------------------------------------------------------------------------------------|------------------------------------------------------------------------------------------------------------------------------------------------------------------------------------------------------------------------|------------------------------------------------------------------------------------------------------------------------------------------------------------------------------------------------------------------------------------------------------------------------------------------------|----------------------------------------------------------------------------|
| Infection                                                                     | Sinusitis 11%,<br>Upper respiratory 17%<br>Influenza 7%<br>Pneumonia, fungal, cellulitis,<br>gastroenteritis: listed without rate<br>Pediatric Infectious disease: 45%<br>to 78%                                                                                                                                                                                                                                                                                                                                    | Upper Respiratory 17%<br>Sinusitis 11%<br>Urinary Tract <8%<br>"Serious Infection" 9%<br>Pneumonia <4%<br>Herpes simplex, zoster <4%<br>Fungal <1%<br>Cellulitis: 1-10%                                                | Upper Respiratory 17%<br>Sinusitis 11%<br>Influenza 7%<br>Urinary Tract 8%<br>Gastroenteritis <5%                                                                                                                                                                                              | 9.6%<br>(Serious infection such as<br>Tuberculosis examined<br>separately) |
| Headache                                                                      | Headache 12%                                                                                                                                                                                                                                                                                                                                                                                                                                                                                                        | Headache: 12%                                                                                                                                                                                                          | Headache 12%                                                                                                                                                                                                                                                                                   | 12%                                                                        |
| Neurologic: Dizzy-fall,<br>gait, groggy, memory,<br>confusion                 | Case report: gait disturbance                                                                                                                                                                                                                                                                                                                                                                                                                                                                                       | Confusion <5%                                                                                                                                                                                                          | Confusion <5%<br>Syncope <5%<br>Tremor <5%                                                                                                                                                                                                                                                     | 2.5%                                                                       |
| Endocrine/metabolic                                                           | Hyperlipidemia 7%                                                                                                                                                                                                                                                                                                                                                                                                                                                                                                   | Hyperlipidemia 7%<br>Hypercholesterolemia 6%<br>Dehydration <5%<br>Ketosis <5%                                                                                                                                         | Hyperlipidemia 7%<br>Hypercholesterolemia 6%<br>Dehydration <5%<br>Ketosis <5%                                                                                                                                                                                                                 | 4.5%                                                                       |
| Arthralgia, joint pain,<br>arthropathy, arthritis not<br>related to condition | Arthralgia 3%                                                                                                                                                                                                                                                                                                                                                                                                                                                                                                       | Arthralgia 3%<br>Arthropathy <5%<br>Arthritis <5%                                                                                                                                                                      | Arthralgia 3%                                                                                                                                                                                                                                                                                  | 3%                                                                         |
| Cardiovascular                                                                | Atrial fibrillation <5%, Cardiac<br>arrest <5%, Cardiac dysrhythmia<br><5%, Chest pain <5%, Heart<br>failure, <5%, Myocardial infarction<br><5%, Palpitations <5%                                                                                                                                                                                                                                                                                                                                                   | Atrial fibrillation <5%, cardiac<br>arrest <5%, cardiac arrhythmia<br><5%, chest pain <5%, coronary<br>artery disease <5%, myocardial<br>infarction <5%, palpitations <5%,<br>tachycardia <5%                          | Cardiac arrest, pericardial<br>effusion, pericarditis, and<br>syncope <5%                                                                                                                                                                                                                      | 2.5%                                                                       |
| Hematologic/Oncologic                                                         | Thrombosis: case report<br>Bleeding: case report<br>Anemia: case report<br>Leukopenia: case report<br>In adult clinical trials, the most<br>common reported malignancies<br>were lymphoma, non-melanoma<br>skin cancer, melanoma, and<br>malignancies of the breast, colon,<br>prostate, and lung<br>Lymphoma: Package insert states<br>3 fold risk<br>Melanoma: Package insert states<br>risk, no rates reported<br>Carcinoma: case report<br>Prostate Cancer no rates reported<br>Breast cancer no rates reported | All anemias <1%<br>Neutropenia <1%<br>Leukopenia <1%<br>Thrombocytopenia <1%<br>Deep vein thrombosis <5%<br>Pulmonary embolism <1%<br>Leukemia <1%<br>Carcinomas: <1%<br>Lymphomas: <1%<br>Melanoma: no rates reported | Agranulocytosis <5%<br>Subdural hematoma <5%<br>leg thrombosis <5%<br>polycythemia <5%<br>Lymphomas: potential risk, no<br>rate<br>Non-melanoma skin cancer:<br>0.7/100 patient years (control<br>rate 0.8/100 PY)<br>Leukemia and carcinomas may<br>have increased risk- no rates<br>reported | 1%                                                                         |

|             |                                                                                                                                                                   |                                                                                                                                                                        |                                                                                                                                                                                                                    |                |
|-------------|-------------------------------------------------------------------------------------------------------------------------------------------------------------------|------------------------------------------------------------------------------------------------------------------------------------------------------------------------|--------------------------------------------------------------------------------------------------------------------------------------------------------------------------------------------------------------------|----------------|
| Hepatic     | Liver enzyme elevations 4.4%<br>Acute hepatic failure: case report<br>Hepatic necrosis <5%<br>Hepatitis: case report<br>Hepatitis B reactivation: rate not listed | Increased liver enzymes 5%<br>Hepatic necrosis <5%<br>Hepatic failure <1%<br>Hepatic necrosis <1%<br>Hepatitis B reactivation: <1%<br>Idiosyncratic hepatotoxicity <1% | Elevated liver enzymes 3.5%<br>Elevated liver enzymes in pediatric patients: 2.6-4.4%<br>Hepatic necrosis <5%<br>Hepatitis B reactivation: rate not listed<br>Acute liver failure and hepatitis: rate not reported | Composite 2.4% |
| Ophthalmic  | Optic neuritis: case report                                                                                                                                       | Cataract <5%                                                                                                                                                           | Cataract <5%                                                                                                                                                                                                       | 2.5%           |
| Renal       | Not reported                                                                                                                                                      | Nephrolithiasis <5%                                                                                                                                                    | Kidney Calculus <5%                                                                                                                                                                                                | 2.5%           |
| Respiratory | Bronchospasm <5%<br>Dyspnea <5%<br>Pleural effusion <5%<br>Interstitial disease: rate not reported                                                                | Asthma <5%<br>Bronchospasm <5%<br>Dyspnea <5%<br>Pleural effusion <5%<br>Respiratory depression <5%                                                                    | Dyspnea <5%<br>Pulmonary fibrosis: rate not reported                                                                                                                                                               | 2.5%           |

Serious: angioedema, in CP & faers face swelling

TB

Heart attack

Common: dermatologic greater than injection site due to 519 reports of psoriasis- in twitter we classified this as indication

Note: package insert has many updates, but not databases

See black box warning for malignancies

Lexicomp: Elderly: Infection and malignancy has been reported at a higher incidence; use caution in elderly patients.

If "<" was in range then center value was selected as point estimate; e.g. if categories were <1%, or <5% then 0.5% was selected as point estimate for <1 and 2.5% was selected for <5%

## Unified Medical Language System Concept Codes and Adverse Reaction Categories

| Category                | umlsconceptnameKO | UMLS conceptIdKO                |
|-------------------------|-------------------|---------------------------------|
| <b><u>Abdominal</u></b> | c0000729          | abdominal cramp                 |
|                         | c0000737          | abdominal pain                  |
|                         | c0009806          | constipation                    |
|                         | c0392176          | gi upset                        |
|                         | c0278061          | hard stools                     |
|                         | c0235119          | hunger abnormal                 |
|                         | c1258215          | ileus                           |
|                         | c0232461          | increase appetite               |
|                         | c1971624          | lack of appetite                |
|                         | c0375548          | nausea                          |
|                         | c0027497          | nausea                          |
|                         | c0221512          | pain stomach                    |
|                         | c0030252          | palpitations                    |
|                         | c0344375          | stomach cramps                  |
|                         | c0235309          | stomach discomfort              |
|                         | c0221512          | stomach pain                    |
|                         | c0577027          | stomach problem                 |
|                         | c0235309          | stomach upset                   |
|                         | c0000731          | swelling abdomen                |
|                         | c0235309          | upset stomach                   |
| c0042963                | vomit             |                                 |
| c0018926                | vomiting blood    |                                 |
| <b><u>Allergy</u></b>   | c1527304          | allergic reaction               |
|                         | c0042109          | hives                           |
|                         | c0151726          | hypersensitivity injection site |
| Anxiety/Mood            | c0278061          | abnormal mental state           |
|                         | c0001897          | aggressive                      |
|                         | c0003467          | anxiety                         |
|                         | c0700031          | anxiety attack                  |
|                         | c0850592          | feeling moody                   |
|                         | c0235129          | feeling strange                 |
|                         | c0857486          | felt like a zombie              |
|                         | c0022107          | irritable                       |
|                         | c0235109          | mental distress                 |

**Neurologic/dizzy**

|          |                      |
|----------|----------------------|
| c0085633 | mood swings          |
| c0746848 | nerve problem        |
| c0027769 | nervous tension      |
| c0027769 | nervousness          |
| c0086769 | panic attacks        |
| c0086796 | panic attacks        |
| c0038435 | stress               |
| c0038441 | stress disorder      |
| c0149784 | stress reaction      |
| c0541992 | brain fog            |
| c0009676 | confusion            |
| c0012833 | dizzy                |
| c0857087 | dizzy spell          |
| c0541992 | groggy               |
| c0220870 | light-headed         |
| c0751295 | memory loss          |
| c0442874 | neuropathy           |
| c0012833 | wooziness            |
| c0013144 | drowsy               |
| c0917799 | excessive sleepiness |
| c0392674 | exhausted            |
| c0277794 | extreme exhaustion   |
| c0015672 | fatigue              |
| c0015672 | lack of energy       |
| c0023380 | lethargic            |
| c0015672 | loss of energy       |
| c0231218 | malaise              |
| c0235161 | sleep decreased      |
| c0037317 | sleep disturbed      |
| c0013144 | sleepiness           |
| c0234450 | sleepy               |
| c0015672 | tired                |
| c0239885 | dull headache        |
| c0221100 | hangover effect      |
| c0018681 | headache             |
| c0149931 | migraine             |

**Fatigue**

**Headache**

**Infection**

c0000833 abscess  
c0149725 chest infection  
c0009443 common cold  
c0149678 Epstein-barr virus infection  
c0015967 fever  
c0021400 flu  
c0392171 flu-like symptoms  
c0026946 fungal infection  
c0021311 infection  
c0947879 infection  
c1609538 latent tuberculosis  
c1609538 latent tuberculosis  
c0032285 pneumonia  
c1398341 sinus infection  
c0522251 sinus pain  
c0318712 viral gastroenteritis  
c0042029 urinary tract infection

**Injection Site**

c0151698 injection site bleeding  
c0521508 injection site bruising  
c0877661 injection site burning  
c0151734 injection site inflammation  
c0852995 injection site itching  
c0151775 injection site mass  
c0151828 injection site pain  
c0151735 injection site reaction  
c1142080 injection site stinging  
c0151605 injection site swelling  
c0392196 injection site urticaria  
c0033774 itch  
c1096717 pain at the injection  
c0521505 rash injection site

**Myocardial/cardiac**

c0549646 chest disorders  
c0008031 chest pains  
c0235239 heart fluttering  
c0235239 heart irregular  
c1868917 heart racing

**Pain**

|          |               |
|----------|---------------|
| c0030252 | palpitations  |
| c0234238 | ache          |
| c0239377 | arm pain      |
| c0151825 | bone pain     |
| c0016512 | foot pain     |
| c0019559 | hip pain      |
| c0003862 | joint pain    |
| c0231749 | knee pain     |
| c0023222 | leg pain      |
| c0231528 | muscle pain   |
| c0030193 | pain          |
| c0030794 | pelvic pain   |
| c0037011 | shoulder pain |
| c0522251 | sinus pain    |
| c0231218 | sick          |

Serious Illnesses that I would like to know separately:

|          |                              |
|----------|------------------------------|
| c1609538 | latent tuberculosis          |
| c0019080 | hemorrhage                   |
| c0206277 | fatal outcome                |
| c0149678 | Epstein-barr virus infection |
