# Supplementary material for: Methods to Compare Adverse Events in Twitter to FAERS, Drug Information Databases, and Systematic Reviews: Proof of Concept with Adalimumab
Source: PubMed Central journal article supplement — Drug Saf. 2018 Aug 30;41(12):1397–410. doi: 10.1007/s40264-018-0707-6 (PMC6223697; doi:10.1007/s40264-018-0707-6), 2018-08-30
Supplement: 40264_2018_707_MOESM2_ESM.pdf [file 40264_2018_707_MOESM2_ESM.pdf]

## Electronic Supplementary Material 2

**Article Title:** Methods to compare Adverse Events in Twitter to FAERS, Drug Information Databases, and Systematic Reviews: Proof of Concept with Adalimumab

**Journal:** Drug Safety

**Authors:**

Karen Smith<sup>1</sup>, Su Golder<sup>2</sup>, Abeed Sarker<sup>3</sup>, Yoon Loke<sup>4</sup>, Karen O'Connor<sup>3</sup>, Graciela Gonzalez-Hernandez<sup>3</sup>

<sup>1</sup>Rueckert-Hartman College for Health Professions, Regis University, Denver, CO, USA.

<sup>2</sup>Department of Health Sciences, University of York, York, UK.

<sup>3</sup>Department of Biostatistics, Epidemiology and Informatics, Perelman School of Medicine, University of Pennsylvania, Philadelphia, PA, USA.

<sup>4</sup>Norwich Medical School, University of East Anglia, Norwich, UK.

**Corresponding author:**

Graciela Gonzalez-Hernandez

Email: gragon@pennmedicine.upenn.edu

Appendix 2: Systematic Reviews of Adalimumab and Reported Adverse Drug Events

| Systematic Review                                 | Type of Evidence | Adverse Effect in Humira Patients                                                                                                                                                                                                                                                                                                                                                                                                                                                                                                                                                                                       | Adverse Effect in Control Group Patients (Placebo)                                                                                                                              |
|---------------------------------------------------|------------------|-------------------------------------------------------------------------------------------------------------------------------------------------------------------------------------------------------------------------------------------------------------------------------------------------------------------------------------------------------------------------------------------------------------------------------------------------------------------------------------------------------------------------------------------------------------------------------------------------------------------------|---------------------------------------------------------------------------------------------------------------------------------------------------------------------------------|
| <b>Results Presented as Rates (Highest First)</b> |                  |                                                                                                                                                                                                                                                                                                                                                                                                                                                                                                                                                                                                                         |                                                                                                                                                                                 |
| Archer 2016                                       | 4 RCTs           | <b>Infections</b> 32/223 (14.3%), 116/257 (45.1%), 17/90 (18.9%)<br><b>Injection site reactions</b> 13/223 (5.8%), 31/257 (12.1%), 10.5 events per 100 PYs, 7/90 (7.8%)<br><b>Serious infections</b> 0/223 (0%), 4/257 (1.6%), 3.4 events per 100 PYs, 3/90 (3.3%)<br><b>Haematological reactions</b> 5/257 (1.9%), 1/90 (1.1%)<br><b>Hepatobiliary events</b> 0.5 events per 100 PYs, 1/90 (1.1%)<br><b>Tuberculosis</b> <0.1 events per 100 PYs, 1.0 events per 100 PYs<br><b>Malignancies</b> 0/223 (0%), 2/257 (0.8%), 1.0 events (excluding lymphoma) per 100 PYs, 1 events per 100 PYs for lymphoma, 1/90, (1.1%) | <b>Infections</b> 35/223 (15.7%), 103/260 (39.1%), 15/96 (15.6%)<br><b>Injection site reactions</b> 7/223 (3.1%), 10/260 (3.8%), 2/96 (2.1%)<br><b>Serious infections</b> 3/223 |

|                  |                          |                                                                                                                                                                                                                                                                                                                                                                                                                                                                                                                                                                                                                                                                                                                                                                                                                                                                                                                                                                                                                                  |                                                                                                                                                                                                                                                                                                                                 |
|------------------|--------------------------|----------------------------------------------------------------------------------------------------------------------------------------------------------------------------------------------------------------------------------------------------------------------------------------------------------------------------------------------------------------------------------------------------------------------------------------------------------------------------------------------------------------------------------------------------------------------------------------------------------------------------------------------------------------------------------------------------------------------------------------------------------------------------------------------------------------------------------------------------------------------------------------------------------------------------------------------------------------------------------------------------------------------------------|---------------------------------------------------------------------------------------------------------------------------------------------------------------------------------------------------------------------------------------------------------------------------------------------------------------------------------|
|                  |                          | <b>Heart failure</b> 1/257 (0.4%), 0.2 events per 100 PYs<br><b>Lupus-like syndrome</b> 1/257 (0.4%)                                                                                                                                                                                                                                                                                                                                                                                                                                                                                                                                                                                                                                                                                                                                                                                                                                                                                                                             | (1.3%) (one pneumonia, one sepsis, one staphylococcal wound infection), 5/260 (1.9%), 0/96 (0%)<br><b>Malignancies</b> 2/223 (0.9%), 0/257 (0%), 0/96 (0%)<br><b>Hepatobiliary events</b> 1//96 (1.0%)<br><b>haematological reactions</b> 0/257 (0%), 1//96 (1.0%)<br><b>Lupus-like syndrome, Heart failure, Tuberculosis</b> 0 |
| Dziechciarz 2016 | 1 RCT and 10 case series | <b>Infections</b> 162/599<br><b>Injection sites reactions</b> 89/599<br><b>Haematological (serious)</b> 24/599<br><b>Allergic reactions (serious)</b> 10/599<br><b>Hepatic-related (serious)</b> 10/599<br><b>Arthralgia/myalgia</b> 7/599<br><b>Xerosis</b> 6/599<br><b>Abdominal pain</b> 5/599<br><b>Headache</b> 5/599<br><b>Nausea</b> 5/599<br><b>Allergy</b> 4/599<br><b>Abdominal abscess (serious)</b> 3/599<br><b>Depigmentation acne</b> 3/599<br><b>Fever</b> 3/599<br><b>Rash</b> 3/599<br><b>Deaths from central catheter sepsis</b> 2/599<br><b>C. Difficile infection (serious)</b> 2/599<br><b>Perianal abscess (serious)</b> 2/599<br><b>Psoriasis</b> 2/599<br><b>Tiredness</b> 2/599<br><b>Tympanic perforation</b> 1/599<br><b>Dizziness</b> 1/599<br><b>Hair loss</b> 1/599<br><b>Dyspnoea</b> 1/599<br><b>Transient visual loss</b> 1/599<br><b>Stomal bleeding</b> 1/599<br><b>Itching</b> 1/599<br><b>Numbness</b> 1/599<br><b>Medulloblastoma (serious)</b> 1/599<br><b>Meningitis (serious)</b> 1/599 |                                                                                                                                                                                                                                                                                                                                 |

|              |                                                                                                     |                                                                                                                                                                                                                                                                                                                                                                                                                                                                                                                            |                                                                                                                                                                                                                                                       |
|--------------|-----------------------------------------------------------------------------------------------------|----------------------------------------------------------------------------------------------------------------------------------------------------------------------------------------------------------------------------------------------------------------------------------------------------------------------------------------------------------------------------------------------------------------------------------------------------------------------------------------------------------------------------|-------------------------------------------------------------------------------------------------------------------------------------------------------------------------------------------------------------------------------------------------------|
|              |                                                                                                     | <b>Anal abscess (serious) 1/599</b><br><b>Stomal abscess with fistula (serious) 1/599</b><br><b>Colonic obstruction and abscess (serious) 1/599</b><br><b>Seton placement (serious) 1/599</b><br><b>Staphylococcal folliculitis (serious) 1/599</b><br><b>Scarlet fever (serious) 1/599</b><br><b>Disseminated histoplasmosis(serious) 1/599</b><br><b>Gastroenteritis (serious) 1/599</b><br><b>H1N1 influenza (serious) 1/599</b><br><b>Viral infection (serious) 1/599</b><br><b>Yersinia infection (serious) 1/599</b> |                                                                                                                                                                                                                                                       |
| Wang 2014    | 4 RCTs (not all report all AEs)                                                                     | <b>Infection 119/528 RR 1.22 (0.98-1.60)</b><br><b>Injection-site reaction 48/437 RR 4.88 (1.97-12.09) P=0.0006</b>                                                                                                                                                                                                                                                                                                                                                                                                        | <b>Infection 63/316</b><br><b>Injection-site reaction 5/222</b>                                                                                                                                                                                       |
| Dretzke 2011 | 4 RCTs (all included in Huang 2011)                                                                 | <b>All infusion reactions 164/938 (17.48%)</b><br><b>Serious infection 16/938 (1.71%)</b><br><b>TB 2/938 (0.21%)</b><br><b>Cancer 0/938 (0%)</b><br><b>Death 0/938 (0%)</b><br><b>Lupus-like syndrome 0/421</b><br><b>Demyelinating disorders 0/554</b>                                                                                                                                                                                                                                                                    | <b>All infusion reactions 40/519 (7.71%)</b><br><b>Serious infection 13/519 (2.50%)</b><br><b>Cancer 2/519 (0.39%)</b><br><b>Death 0/519 (0%)</b><br><b>TB 0/519 (0%)</b><br><b>Lupus-like syndrome 0/258</b><br><b>Demyelinating disorders 0/279</b> |
| Huang 2011   | 4 RCTs (all included in Dretzke 2011)                                                               | <b>2 Induction trials</b><br><b>Infection site reaction 86/384 P=0.05</b><br><b>Infection 63/384 P=0.21</b><br><br><b>2 Maintenance trials</b><br><b>Infection 254/554 P=0.64</b><br><b>Infection site reaction 81/554 P=0.85</b><br><br>Reported other AEs such as arthralgia, nasopharyngitis, headache, nausea, fatigue, abdominal pain, pharyngolaryngeal pain                                                                                                                                                         | <b>2 Induction trials</b><br><b>Infection 51/240</b><br><b>Infection site reaction 30/240</b><br><br><b>2 Maintenance trials</b><br><b>Infection 114/279</b><br><b>Infection site reaction 11/279</b>                                                 |
| Rodgers 2011 | 2 RCTS (1 RCT overlap with Wiens 2010 but different outcomes extracted) and 10 uncontrolled studies | <b>ADA</b><br><b>RCT (n=102)</b><br><b>Infections 17.6%</b><br><b>Upper respiratory tract infection (URTI) 13.7%</b><br><br><b>RCT (n=315)</b><br><b>Upper respiratory tract infection (URTI) 12.6%</b><br><b>Nasopharyngitis 9.9%</b><br><b>Serious infection 1</b><br><b>Death 0</b>                                                                                                                                                                                                                                     | <b>Placebo RCT (n=102)</b><br><b>Infections 32.7%</b><br><b>Upper respiratory tract infection (URTI) 8.2%</b><br><b>Serious infection 1</b><br><br><b>RCT (n=315)</b>                                                                                 |

|                                                              |                                                            |                                                                                                                                                                                                                                                                                                                                                                                                                                                                                                                                                                                                                                                                                                                                                                                                                                                                                                                                                                                                                                                                                                                                                                                                                                                                                                                              |                                                                                                                                                                                   |
|--------------------------------------------------------------|------------------------------------------------------------|------------------------------------------------------------------------------------------------------------------------------------------------------------------------------------------------------------------------------------------------------------------------------------------------------------------------------------------------------------------------------------------------------------------------------------------------------------------------------------------------------------------------------------------------------------------------------------------------------------------------------------------------------------------------------------------------------------------------------------------------------------------------------------------------------------------------------------------------------------------------------------------------------------------------------------------------------------------------------------------------------------------------------------------------------------------------------------------------------------------------------------------------------------------------------------------------------------------------------------------------------------------------------------------------------------------------------|-----------------------------------------------------------------------------------------------------------------------------------------------------------------------------------|
|                                                              |                                                            | <b>10 Non-RCTs</b><br><b>Infections</b> 9.12%/15.20%/45.30%<br><b>Serious infections</b><br>2.20%/3.10%/5.10%/7.30%/1.20%/2.70%/6.60%/0.40%/6.30%<br><b>Cancers</b> 1.10%/0.70%/0.20%/0.10%<br><b>Mortality</b> 0.90%/0.50%/0.20%<br><b>TB</b> 0.18%/0.30%/0%/0.08%/0.40%/0.30%/0.20%/0.30%                                                                                                                                                                                                                                                                                                                                                                                                                                                                                                                                                                                                                                                                                                                                                                                                                                                                                                                                                                                                                                  | <b>Upper respiratory tract infection (URTI)</b><br>14.8%<br><b>Nasopharyngitis</b><br>9.4%<br><b>Death</b> 0                                                                      |
| Díaz-Lagares 2010                                            | 17 case reports/case series and 1 prospective cohort study | <b>Local skin reaction</b> 3/54<br><b>Angioedema</b> 1/54<br><b>Lung fibrosis</b> 1/54                                                                                                                                                                                                                                                                                                                                                                                                                                                                                                                                                                                                                                                                                                                                                                                                                                                                                                                                                                                                                                                                                                                                                                                                                                       |                                                                                                                                                                                   |
| Da 2012                                                      | 1 RCT and 9 open-label cohort studies                      | <b>Fungal pneumonia</b> 6% (1/16)<br><b>Dehydration</b> 1% (1 or 2/159)<br><b>Pruritic erythema</b> 2% (1/50)<br>Injection site pain, headache, fever, Psoriasiform dermatitis, viral upper respiratory tract infection, headache, Abdominal pain, arthralgia, headache, injection-site irritation, fatigue, Crohn's disease exacerbation, Dermatological problems, injection-site discomfort, Injection-site reaction, Upper respiratory tract infection, headache, bronchitis, rash, fatigue, arthritic pain, abdominal pain, back pain, nausea, perianal abscess, numbness, injection-site reaction, Dermatological problems, nausea/vomiting, diarrhea, dizziness, muscle/limb pain, arthralgia, cough, dysphagia, fatigue, weakness, metrorrhagia, fever, Injection-site reaction, headache, upper respiratory tract infection, dermatitis, pharyngitis, otitis, abdominal pain, fever, palpitations, tooth abscess, Injection-site reaction, facial rash, pruritus, dizziness, sinusitis, rhinitis<br>SAES - Abdominal abscess, tuberculous meningitis, Crohn's disease exacerbation, intestinal obstruction, abdominal pain, gastroenteritis, abscess, ileal stenosis, constipation, pneumonia, dehydration, nephrolithiasis, bronchospasm, dehydration, fungal pneumonia, Abdominal pain, seizure, Pruritic erythema |                                                                                                                                                                                   |
| McLeod 2007                                                  | 2 RCTs                                                     | <b>Infectious AEs</b> 60 patients (24%) and 84 patients (34%)<br><b>Injection site reactions</b> 24 patients and 25 patients (10%)<br><b>Hypersensitivity</b> 1 patient<br><b>Death, cancer, demyelinating disease</b> 0                                                                                                                                                                                                                                                                                                                                                                                                                                                                                                                                                                                                                                                                                                                                                                                                                                                                                                                                                                                                                                                                                                     | <b>Infectious AEs</b> 26 patients (17%) and 32 patients (26%)<br><b>Injection site reactions</b> 7 patients 5%<br><b>Hypersensitivity, Death, cancer, demyelinating disease</b> 0 |
| <b>Results Presented as Risk Ratios Only (Highest First)</b> |                                                            |                                                                                                                                                                                                                                                                                                                                                                                                                                                                                                                                                                                                                                                                                                                                                                                                                                                                                                                                                                                                                                                                                                                                                                                                                                                                                                                              |                                                                                                                                                                                   |
| Wiens 2010                                                   | 6 RCTs (1 RCT overlap)                                     | <b>ADA</b><br><b>Deaths N=2428 RR 2.52 (0.72–8.86) p=0.15</b>                                                                                                                                                                                                                                                                                                                                                                                                                                                                                                                                                                                                                                                                                                                                                                                                                                                                                                                                                                                                                                                                                                                                                                                                                                                                |                                                                                                                                                                                   |

|                                                                  |                                                                                                   |                                                                                                                                                                                                                                                                                                                                                                                                                                                                                                                                                                                                                                                                                                                                                                                                                                                                                                                                                                                                                                                                                                                                                                                                                                                                                                                                                                                                                                                                                                                      |                                                                                                                                                                                                                                                                                                                                              |
|------------------------------------------------------------------|---------------------------------------------------------------------------------------------------|----------------------------------------------------------------------------------------------------------------------------------------------------------------------------------------------------------------------------------------------------------------------------------------------------------------------------------------------------------------------------------------------------------------------------------------------------------------------------------------------------------------------------------------------------------------------------------------------------------------------------------------------------------------------------------------------------------------------------------------------------------------------------------------------------------------------------------------------------------------------------------------------------------------------------------------------------------------------------------------------------------------------------------------------------------------------------------------------------------------------------------------------------------------------------------------------------------------------------------------------------------------------------------------------------------------------------------------------------------------------------------------------------------------------------------------------------------------------------------------------------------------------|----------------------------------------------------------------------------------------------------------------------------------------------------------------------------------------------------------------------------------------------------------------------------------------------------------------------------------------------|
|                                                                  | with Rodgers 2011 but different outcomes extracted)                                               | <b>Serious infections N=2300</b> RR 2.22 (0.83–5.99) p=0.11<br><b>Malignancy N=1467</b> RR 0.55 (0.14–2.11) p=0.38                                                                                                                                                                                                                                                                                                                                                                                                                                                                                                                                                                                                                                                                                                                                                                                                                                                                                                                                                                                                                                                                                                                                                                                                                                                                                                                                                                                                   |                                                                                                                                                                                                                                                                                                                                              |
| <b>Results Presented as Events/Patient-years (Highest First)</b> |                                                                                                   |                                                                                                                                                                                                                                                                                                                                                                                                                                                                                                                                                                                                                                                                                                                                                                                                                                                                                                                                                                                                                                                                                                                                                                                                                                                                                                                                                                                                                                                                                                                      |                                                                                                                                                                                                                                                                                                                                              |
| Shepherd 2016                                                    | 1 RCT                                                                                             | <b>n=38</b><br><b>18.3 patient-years</b><br><b>Related to injection-site reaction 73 (4.0)</b><br><b>Contusion 12 (0.7)</b><br><b>Excoriation 10 (0.6)</b><br><b>Viral infection 7 (0.4)</b><br><b>Upper respiratory tract infection 6 (0.3)</b><br><b>Nasopharyngitis 5 (0.3)</b><br><b>Vomiting 4 (0.2)</b><br><b>Gastroduodenitis 0</b>                                                                                                                                                                                                                                                                                                                                                                                                                                                                                                                                                                                                                                                                                                                                                                                                                                                                                                                                                                                                                                                                                                                                                                           | <b>n=37</b><br><b>15 patient-years</b><br><b>Related to injection-site reaction 57 (3.8)</b><br><b>Contusion 7 (0.5)</b><br><b>Nasopharyngitis 6 (0.4)</b><br><b>Upper respiratory tract infection 5 (0.3)</b><br><b>Viral infection 3 (0.2)</b><br><b>Vomiting 2 (0.1)</b><br><b>Excoriation 1 (0.1)</b><br><b>Gastroduodenitis 1 (0.1)</b> |
| Burmester 2013                                                   | 71 clinical trials including RCTs, open-label trials and long-term extension studies (not listed) | <b>Events/100 patient-years</b><br><b>Serious infections</b> Rheumatoid arthritis 4.6, Juvenile idiopathic arthritis 2.0, Ankylosing spondylitis 1.4, Psoriatic arthritis 2.8, Psoriasis 1.7, Crohn’s disease 6.7<br><b>Malignancies excluding lymphoma and NMSC</b> Rheumatoid arthritis 0.9, Juvenile idiopathic arthritis 0, Ankylosing spondylitis 0.2, Psoriatic arthritis 0.2, Psoriasis <0.1, Crohn’s disease <0.1<br><b>Any AE leading to death</b> Rheumatoid arthritis 0.8, Juvenile idiopathic arthritis 0, Ankylosing spondylitis <0.1, Psoriatic arthritis 0.3, Psoriasis 0.2, Crohn’s disease 0.1<br><b>Active tuberculosis</b> Rheumatoid arthritis 0.3, Juvenile idiopathic arthritis 0, Ankylosing spondylitis 0, Psoriatic arthritis 0.2, Psoriasis 0.1, Crohn’s disease <0.1<br><b>NMSC†</b> Rheumatoid arthritis 0.2, Juvenile idiopathic arthritis 0, Ankylosing spondylitis 0.3, Psoriatic arthritis 0.1, Psoriasis 0.1, Crohn’s disease 0.1<br><b>CHF</b> Rheumatoid arthritis 0.2, Juvenile idiopathic arthritis 0, Ankylosing spondylitis 0.1, Psoriatic arthritis 0, Psoriasis <0.1, Crohn’s disease 0<br><b>New onset/worsening of psoriasis</b> Rheumatoid arthritis <0.1, Juvenile idiopathic arthritis 0, Ankylosing spondylitis <0.1, Psoriatic arthritis 0.1, Psoriasis <0.1, Crohn’s disease <0.1<br><b>Opportunistic infections</b> Rheumatoid arthritis <0.1, Juvenile idiopathic arthritis 0, Ankylosing spondylitis 0, Psoriatic arthritis 0, Psoriasis 0, Crohn’s disease <0.1 |                                                                                                                                                                                                                                                                                                                                              |

|             |                      |                                                                                                                                                                                                                                                                                                                                                                                                                                                                                                                                                                                                                                                                                                                                                                                                                                                                                                                                                                                                                                                                                                                                                                                                                                                                                                                                                                                                                                                                                                                                                                                                                                                                                          |                                                                                                                                                                                                                                                                                 |
|-------------|----------------------|------------------------------------------------------------------------------------------------------------------------------------------------------------------------------------------------------------------------------------------------------------------------------------------------------------------------------------------------------------------------------------------------------------------------------------------------------------------------------------------------------------------------------------------------------------------------------------------------------------------------------------------------------------------------------------------------------------------------------------------------------------------------------------------------------------------------------------------------------------------------------------------------------------------------------------------------------------------------------------------------------------------------------------------------------------------------------------------------------------------------------------------------------------------------------------------------------------------------------------------------------------------------------------------------------------------------------------------------------------------------------------------------------------------------------------------------------------------------------------------------------------------------------------------------------------------------------------------------------------------------------------------------------------------------------------------|---------------------------------------------------------------------------------------------------------------------------------------------------------------------------------------------------------------------------------------------------------------------------------|
|             |                      | <p><b>Demyelinating disorder</b> Rheumatoid arthritis &lt;0.1, Juvenile idiopathic arthritis 0, Ankylosing spondylitis &lt;0.1, Psoriatic arthritis 0, Psoriasis 0, Crohn's disease 0.1</p> <p><b>Lupus-like syndrome</b> Rheumatoid arthritis &lt;0.1, Juvenile idiopathic arthritis 0, Ankylosing spondylitis 0.1, Psoriatic arthritis 0, Psoriasis 0, Crohn's disease &lt;0.1</p> <p><b>Lymphoma</b> Rheumatoid arthritis 0.1, Juvenile idiopathic arthritis 0, Ankylosing spondylitis &lt;0.1, Psoriatic arthritis 0.2, Psoriasis &lt;0.1, Crohn's disease &lt;0.1</p> <p><b>Melanoma</b> Rheumatoid arthritis &lt;0.1, Juvenile idiopathic arthritis 0, Ankylosing spondylitis &lt;0.1, Psoriatic arthritis 0, Psoriasis 0.2, Crohn's disease 0</p> <p><b>Standardized Incidence Rates</b></p> <p><b>Lymphomas</b> Rheumatoid arthritis 2.74 (1.83-3.93), Ankylosing spondylitis 1.93 (0.03-10.7), Psoriatic arthritis 5.88 (0.66-21.2) Psoriasis 0.63 (0.01-3.49), Crohn's disease 2.58 (0.29-9.31)</p> <p><b>All malignancies</b> Rheumatoid arthritis 0.93 (0.82-1.06), Ankylosing spondylitis 0.51 (0.16-1.19), Psoriatic arthritis 0.68 (0.22-1.59), Psoriasis 0.96 (0.65-1.36), Crohn's disease 1.52 (0.95-2.31)</p> <p><b>NMSC</b> Rheumatoid arthritis 1.39 (1.19-1.60), Ankylosing spondylitis (0.80 (0.29-1.74), Psoriatic arthritis 1.25 (0.46-2.72), Psoriasis 1.76 (1.26-2.39), Crohn's disease 2.29 (1.44-3.47)</p> <p><b>Standardized Mortality Rates</b></p> <p>All indications 0.66 (0.53-0.80), Rheumatoid arthritis 0.69 (0.56-0.85), Ankylosing spondylitis, Psoriatic arthritis 0.43 (0.01-2.39), Psoriasis 0.2 (0-1.11), Crohn's disease 0.57 (0.12-1.68)</p> |                                                                                                                                                                                                                                                                                 |
| Asking 2011 | 23 RCTs (not listed) | <p><b>All cancers including non-melanoma skin cancer</b><br/>Events/person-years 41/2859, Rate/100,000 1434, Hazards ratio (1.40 (0.78-2.61)</p> <p><b>Non-melanoma skin cancer only</b><br/>Events/person-years 23/2863, Rate/100,000 803, Hazards ratio 2.59 (1.01, 7.67)</p> <p><b>All site cancers excluding non-melanoma skin cancer</b><br/>Events/person-years 18/2869, Rate/100,000 627, Hazards ratio 0.92 (0.42, 2.14)–1.09 (0.56, 2.23)</p>                                                                                                                                                                                                                                                                                                                                                                                                                                                                                                                                                                                                                                                                                                                                                                                                                                                                                                                                                                                                                                                                                                                                                                                                                                   | <p><b>All cancers including non-melanoma skin cancer</b><br/>Events/person-years 15/1465, Rate/100,000 1024</p> <p><b>All site cancers excluding non-melanoma skin cancer</b><br/>Events/person-years 10/1468, Rate/100,000 681</p> <p><b>Non-melanoma skin cancer only</b></p> |

|               |                                 |                                                                                                                                                                                                                                                                                                                                                                                                                                                                                                                                                                                                                                                                                                                                                                                                                                                                                                                                                                                                                                                                                                                                                                                                                                                                                                                                                                                                                                                                                                                                                                                                                                                                                                                                                                                                                                                                                                                                                                                                                                                                                                                                                                                                                                                                                                                                                                                                                                                                                                                    |                                                                                                                                                                                                                                                                                                                                                                                                                                                                                                                                                                                                                                                                                                                                         |
|---------------|---------------------------------|--------------------------------------------------------------------------------------------------------------------------------------------------------------------------------------------------------------------------------------------------------------------------------------------------------------------------------------------------------------------------------------------------------------------------------------------------------------------------------------------------------------------------------------------------------------------------------------------------------------------------------------------------------------------------------------------------------------------------------------------------------------------------------------------------------------------------------------------------------------------------------------------------------------------------------------------------------------------------------------------------------------------------------------------------------------------------------------------------------------------------------------------------------------------------------------------------------------------------------------------------------------------------------------------------------------------------------------------------------------------------------------------------------------------------------------------------------------------------------------------------------------------------------------------------------------------------------------------------------------------------------------------------------------------------------------------------------------------------------------------------------------------------------------------------------------------------------------------------------------------------------------------------------------------------------------------------------------------------------------------------------------------------------------------------------------------------------------------------------------------------------------------------------------------------------------------------------------------------------------------------------------------------------------------------------------------------------------------------------------------------------------------------------------------------------------------------------------------------------------------------------------------|-----------------------------------------------------------------------------------------------------------------------------------------------------------------------------------------------------------------------------------------------------------------------------------------------------------------------------------------------------------------------------------------------------------------------------------------------------------------------------------------------------------------------------------------------------------------------------------------------------------------------------------------------------------------------------------------------------------------------------------------|
|               |                                 |                                                                                                                                                                                                                                                                                                                                                                                                                                                                                                                                                                                                                                                                                                                                                                                                                                                                                                                                                                                                                                                                                                                                                                                                                                                                                                                                                                                                                                                                                                                                                                                                                                                                                                                                                                                                                                                                                                                                                                                                                                                                                                                                                                                                                                                                                                                                                                                                                                                                                                                    | Events/person-years 5/1468, Rate/100,000 341                                                                                                                                                                                                                                                                                                                                                                                                                                                                                                                                                                                                                                                                                            |
| Leonardi 2011 | 13 Clinical Trials (not listed) | <p>AEs for &gt;5% of patients were nasopharyngitis, upper respiratory infection, and headache</p> <p><b>Placebo-controlled phase</b></p> <p><b>Infectious AE</b> 572 events, 154.4 events/100 PYs</p> <p><b>Serious infectious AE</b> 9 events, 2.43 events/100 PYs</p> <p><b>Allergic reaction</b> 7 events, 1.89 events/100 PYs</p> <p><b>NMSC</b> 5 events, 1.35 events/100 PYs</p> <p><b>Malignancies (excluding NMSC)</b> 3 events, 0.81 events/100 PYs</p> <p><b>Fatal AE</b> 0 events, 0 events/100 PYs</p> <p><b>Opportunistic infections (excluding TB)</b> 1 events, 0.27 events/100 PYs</p> <p><b>TB</b> 0 events, 0 events/100 PYs</p> <p><b>Congestive heart failure</b> 1 events, 0.27 events/100 PYs</p> <p><b>Lymphoma</b> 0 events, 0 events/100 PYs</p> <p><b>Demyelinating disease</b> 0 events, 0 events/100 PYs</p> <p><b>Lupus-like syndrome</b> 0 events, 0 events/100 PYs</p> <p><b>AES in All Adalimumab treatment population</b></p> <p><b>Infectious AE</b> 4301 events, 88.8 events/100 PYs</p> <p><b>Serious infectious AE</b> 80 events, 1.65 events/100 PYs</p> <p><b>Allergic reaction</b> 51 events, 1.05 events/100 PYs</p> <p><b>Malignancies (excluding NMSC)</b> 35 events, 0.72 events/100 PYs</p> <p><b>NMSC</b> 34 events, 0.70 events/100 PYs</p> <p><b>Opportunistic infections (excluding TB)</b> 20 events, 0.41 events/100 PYs</p> <p><b>Congestive heart failure</b> 11 events, 0.23 events/100 PYs</p> <p><b>Fatal AE</b> 9 events, 0.19 events/100 PYs</p> <p><b>TB</b> 7 events, 0.14 events/100 PYs</p> <p><b>Lupus-like syndrome</b> 3 events, 0.06 events/100 PYs</p> <p><b>Lymphoma</b> 1 events, 0.02 events/100 PYs</p> <p><b>Demyelinating disease</b> 1 events, 0.02 events/100 PYs</p> <p><b>Every other week population</b></p> <p><b>Infectious AE</b> 2133 events, 74.7 events/100 PYs</p> <p><b>Serious infectious AE</b> 39 events, 1.37 events/100 PYs</p> <p><b>NMSC</b> 21 events, 0.74 events/100 PYs</p> <p><b>Malignancies (excluding NMSC)</b> 17 events, 0.60 events/100 PYs</p> <p><b>Allergic reaction</b> 15 events, 0.53 events/100 PYs</p> <p><b>Opportunistic infections (excluding TB)</b> 7 events, 0.25 events/100 PYs</p> <p><b>Congestive heart failure</b> 6 events, 0.21 events/100 PYs</p> <p><b>TB</b> 5 events, 0.18 events/100 PYs</p> <p><b>Fatal AE</b> 4 events, 0.14 events/100 PYs</p> <p><b>Demyelinating disease</b> 1 events, 0.04 events/100 PYs</p> <p><b>Lupus-like syndrome</b> 0 events, 0 events/100 PYs</p> | <p><b>Infectious AE</b> 200 events, 115.6</p> <p><b>Serious infectious AE</b> 5 events, 2.89 events/100 PYs</p> <p><b>NMSC</b> 5 events, 1.35 events/100 PYs</p> <p><b>Malignancies (excluding NMSC)</b> 2 events, 1.16 events/100 PYs</p> <p><b>Allergic reaction</b> 1 events, 0.58 events/100 PYs</p> <p><b>Lymphoma</b> 0 events, 0 events/100 PYs</p> <p><b>Fatal AE</b> 0 events, 0 events/100 PYs</p> <p><b>Opportunistic infections (excluding TB)</b> 0 events, 0 events/100 PYs</p> <p><b>TB</b> 0 events, 0 events/100 PYs</p> <p><b>Congestive heart failure</b> 0 events, 0 events/100 PYs</p> <p><b>Demyelinating disease</b> 0 events, 0 events/100 PYs</p> <p><b>Lupus-like syndrome</b> 0 events, 0 events/100 PYs</p> |

|                                                                  |                                                                                                   |                                                                                                                                                                                                                                                                                                                                                                                                                                                                                                                                                                                                                                                                                                                                                                                                                                                                                                                                                                                                                                                                                                                                                                                                                                                                                                                                                                                                                                                                                                                                                                                                                                                                                                                                                                                                                                                                                                                                                                                                                                                                                               |  |
|------------------------------------------------------------------|---------------------------------------------------------------------------------------------------|-----------------------------------------------------------------------------------------------------------------------------------------------------------------------------------------------------------------------------------------------------------------------------------------------------------------------------------------------------------------------------------------------------------------------------------------------------------------------------------------------------------------------------------------------------------------------------------------------------------------------------------------------------------------------------------------------------------------------------------------------------------------------------------------------------------------------------------------------------------------------------------------------------------------------------------------------------------------------------------------------------------------------------------------------------------------------------------------------------------------------------------------------------------------------------------------------------------------------------------------------------------------------------------------------------------------------------------------------------------------------------------------------------------------------------------------------------------------------------------------------------------------------------------------------------------------------------------------------------------------------------------------------------------------------------------------------------------------------------------------------------------------------------------------------------------------------------------------------------------------------------------------------------------------------------------------------------------------------------------------------------------------------------------------------------------------------------------------------|--|
|                                                                  |                                                                                                   | <b>Lymphoma</b> 0 events, 0 events/100 PYs                                                                                                                                                                                                                                                                                                                                                                                                                                                                                                                                                                                                                                                                                                                                                                                                                                                                                                                                                                                                                                                                                                                                                                                                                                                                                                                                                                                                                                                                                                                                                                                                                                                                                                                                                                                                                                                                                                                                                                                                                                                    |  |
| Malottki 2011                                                    | 3 uncontrolled studies                                                                            | <b>Serious infection rate</b> 10/100 patient-years<br><b>TB</b> 0.4/100 patient-years and another study <b>TB</b> 1<br><b>Cellulitis</b> 1<br><b>Herpes zoster</b> 1<br><b>Hypersensitivity reaction</b> 1<br><b>Anaphylactic response</b> 0<br><br>Also Injection site reaction/infusion reaction                                                                                                                                                                                                                                                                                                                                                                                                                                                                                                                                                                                                                                                                                                                                                                                                                                                                                                                                                                                                                                                                                                                                                                                                                                                                                                                                                                                                                                                                                                                                                                                                                                                                                                                                                                                            |  |
| Burmester 2009                                                   | 36 clinical trials including RCTs, open-label trials and long-term extension studies (not listed) | Events/100 patient-years<br><b>Serious infections</b> Rheumatoid arthritis 4.65 Psoriatic arthritis 2.81 Ankylosing spondylitis 1.11 Juvenile idiopathic arthritis 2.76 Psoriasis 1.32 Crohn's disease 5.18<br><b>Tuberculosis</b> Rheumatoid arthritis 0.29 Psoriatic arthritis 0.30 Ankylosing spondylitis 0 Juvenile idiopathic arthritis 0 Psoriasis 0.12 Crohn's disease 0.13<br><b>Opportunistic infections</b> Rheumatoid arthritis 0.09 (17 cases) Psoriatic arthritis 0 Ankylosing spondylitis 0 Juvenile idiopathic arthritis 0 Psoriasis 0 Crohn's disease 0.08 (2 cases)<br><b>Histoplasmosis</b> Rheumatoid arthritis 0.03 Psoriatic arthritis 0 Ankylosing spondylitis 0 Juvenile idiopathic arthritis 0 Psoriasis 0 Crohn's disease 0<br><b>Malignancies excluding lymphoma and NMSC</b> Rheumatoid arthritis 0.76 Psoriatic arthritis 0.30 Ankylosing spondylitis 0.08 Juvenile idiopathic arthritis 0 Psoriasis 0.49 0.46<br><b>Lymphoma</b> Rheumatoid arthritis 0.12 Psoriatic arthritis 0.20 Ankylosing spondylitis 0.08 Juvenile idiopathic arthritis 0 Psoriasis 0 Crohn's disease 0.08<br><b>NMSC</b> Rheumatoid arthritis 0.17 Psoriatic arthritis 0 Ankylosing spondylitis 0.08 Juvenile idiopathic arthritis 0 Psoriasis 0.12 0<br><b>Demyelinating disorder</b> Rheumatoid arthritis 0.05 Psoriatic arthritis 0 Ankylosing spondylitis 0.08 Juvenile idiopathic arthritis 0 Psoriasis 0 Crohn's disease 0.13<br><b>Lupus-like syndrome</b> Rheumatoid arthritis 0.07 Psoriatic arthritis 0 Ankylosing spondylitis 0 Juvenile idiopathic arthritis 0 Psoriasis 0 Crohn's disease 0.04<br><b>Congestive heart failure</b> Rheumatoid arthritis 0.23 Psoriatic arthritis 0 Ankylosing spondylitis 0.16 Juvenile idiopathic arthritis 0 Psoriasis 0 Crohn's disease 0<br><br>Also lymphomas, demyelinating disease, lupus-like syndrome, oral candidiasis, histoplasmosis, cytomegaloviral infections, coccidioidomycosis, toxoplasmosis, listeriosis, nocardiosis, aspergilloma, Pneumocystis, jiroveci infection, oesophageal candidiasis, candida sepsis, Mortality |  |
| <b>List Adverse Effects with incomplete or No Numerical Data</b> |                                                                                                   |                                                                                                                                                                                                                                                                                                                                                                                                                                                                                                                                                                                                                                                                                                                                                                                                                                                                                                                                                                                                                                                                                                                                                                                                                                                                                                                                                                                                                                                                                                                                                                                                                                                                                                                                                                                                                                                                                                                                                                                                                                                                                               |  |
| Ma 2009                                                          | RCTs and open-label cohorts                                                                       | SAEs: Perioral cellulitis, central demyelination, toxic retinopathy, colorectal adenocarcinoma, psoriasis, ileal perforation, Death (2) Psoriasis, angioneurotic oedema, liver abscess, dental abscess, Acute nasopharyngitis, bowel obstruction, Dehydration, Fungal pneumonia, Pruritic erythema, New onset seizure, worsening abdominal pain,                                                                                                                                                                                                                                                                                                                                                                                                                                                                                                                                                                                                                                                                                                                                                                                                                                                                                                                                                                                                                                                                                                                                                                                                                                                                                                                                                                                                                                                                                                                                                                                                                                                                                                                                              |  |



|                           |                                                                                                                    |                                                                                                                                                                                                                            |
|---------------------------|--------------------------------------------------------------------------------------------------------------------|----------------------------------------------------------------------------------------------------------------------------------------------------------------------------------------------------------------------------|
|                           |                                                                                                                    | Pruritis, Death (2), tumours (7), suicidal attempt (1), severe infection (7), Interstitial keratitis                                                                                                                       |
| Chen 2006                 | RCTs, data from postmarketing surveillance, major observational studies and various registries including the BSRBR | Serious infection, malignancy (4), death (4 vs 1 placebo)                                                                                                                                                                  |
| Song 2014                 | 6 RCTs                                                                                                             | <b>AEs:</b> infections, injection site reactions, abdominal tenderness, nausea, flatulence, nasopharyngitis, pharyngitis, and headache<br><b>SAEs:</b> pneumonia, septicemia, tuberculosis, drug-induced lupus, and tumor. |
| Navarro-Sarabia 2005/2006 | RCTs or CCTs                                                                                                       | Injection site reactions, headaches, allergy-like symptoms, colds, upper respiratory tract, infections, rhinitis                                                                                                           |
